# Supplementary material for: The Association of Gut Microbiota With Idiopathic Central Precocious Puberty in Girls
Source: Front Endocrinol (Lausanne). 2020 Jan 22;10:941. doi: 10.3389/fendo.2019.00941 (PMC6987398; doi:10.3389/fendo.2019.00941)
Supplement: Supplementary Table 3 — The correlation between genera and three clinical indicators. [file Table_3.XLSX]

## Sheet: Sheet1
	Spearman correlation			P-value
Taxon	FSH	LH	IR	FSH	LH	IR
Gemmiger	-0.0851251	0.632734	0.403863	0.728974	0.0036444	0.0863783
Ruminococcus	0.022807	0.168421	0.41685	0.926161	0.490672	0.0758162
Roseburia	0.322807	0.157895	-0.0781044	0.177665	0.518543	0.75062
Clostridium XlVb	0.0929825	0.0719298	-0.145678	0.704979	0.769806	0.551793
Coprococcus	0.0324704	0.307152	-0.0649693	0.895016	0.200846	0.791589
Clostridium sensu stricto	-0.00701754	-0.401754	0.000877578	0.977254	0.0881902	0.997155
Oscillibacter	-0.354386	-0.1	0.283458	0.136573	0.683772	0.239596
Clostridium IV	-0.122807	0.0596491	0.127249	0.616466	0.80834	0.603672
Acinetobacter	-0.181621	0.00585875	0.0449368	0.456788	0.981009	0.855058
Fusicatenibacter	-0.129825	-0.189474	-0.185169	0.596303	0.437215	0.44789
Romboutsia	-0.0245614	-0.464912	0.0842475	0.920498	0.0448961	0.731669
Holdemania	0.105263	0.180702	0.135147	0.668013	0.459109	0.581195
Lachnospiracea incertae sedis	-0.0333333	0.266667	0.0131637	0.892241	0.269768	0.957345
Alistipes	-0.132514	0.30803	-0.223003	0.588647	0.199496	0.358783
Pseudomonas	0.111316	-0.253879	-0.085966	0.650052	0.294264	0.726394
Dorea	-0.100921	-0.410706	-0.358209	0.681004	0.080686	0.132096
Clostridium XlVa	0.240351	-0.387719	-0.265906	0.321602	0.100965	0.271188
Odoribacter	-0.0283197	0.451345	0.025676	0.908378	0.0524144	0.916902
Blautia	0.107018	-0.298246	-0.0131637	0.662789	0.21489	0.957345
Parasutterella	0.219394	0.161474	0.192274	0.366812	0.508983	0.430343
Megamonas	-0.153988	0.139828	0.407274	0.529072	0.568042	0.0835052
Haemophilus	0.0350877	-0.215789	0.200965	0.886603	0.374935	0.40938
Clostridium	0.109363	-0.22068	0.226638	0.655827	0.363941	0.350797
Flavonifractor	0.15614	-0.217544	-0.148311	0.52326	0.37097	0.544548
Bilophila	-0.184535	-0.0158172	0.347253	0.449475	0.948756	0.145209
Dialister	0.157964	0.0877578	0.0557507	0.518358	0.720906	0.820665
Eubacterium	-0.193322	0.0984184	0.0193407	0.427786	0.688532	0.937361
Intestinibacter	-0.0912281	-0.278947	0.162352	0.710315	0.247479	0.506652
Barnesiella	0.114992	0.363524	0.0853544	0.639233	0.126044	0.72827
Anaerostipes	-0.308772	-0.317544	-0.0658183	0.198359	0.185247	0.788924
Parabacteroides	0.0333333	-0.0403509	-0.329969	0.892241	0.869723	0.16769
Bifidobacterium	-0.0140351	0.280702	0.405441	0.954524	0.244393	0.0850404
Faecalibacterium	-0.219298	0.115789	-0.0245722	0.367028	0.636896	0.920463
Fusobacterium	0.63269	-0.059754	-0.167033	0.00364747	0.808009	0.494305
Bacteroides	0.126316	0.0157895	-0.0631856	0.60635	0.948846	0.797196
Eggerthella	-0.161474	-0.285213	0.0395083	0.508983	0.236573	0.872422
