# Supplementary material for: The Association of Gut Microbiota With Idiopathic Central Precocious Puberty in Girls
Source: Front Endocrinol (Lausanne). 2020 Jan 22;10:941. doi: 10.3389/fendo.2019.00941 (PMC6987398; doi:10.3389/fendo.2019.00941)
Supplement: Supplementary Table 5 — The correlation between genera and KEGG functional categories. [file Table_5.XLSX]

## Sheet: Genus
genus	kegg	cor	pvalue	FDR
Acinetobacter	Carbohydrate Metabolism	-0.197569	0.178295	0.275932
Acinetobacter	Cell Motility	0.230972	0.114225	0.19799
Acinetobacter	Cellular Processes and Signaling	-0.237753	0.103692	0.187223
Acinetobacter	Energy Metabolism	0.0939307	0.525413	0.615349
Acinetobacter	Environmental Adaptation	-0.0916467	0.535577	0.621172
Acinetobacter	Folding, Sorting and Degradation	-0.0533178	0.71891	0.778819
Acinetobacter	Glycan Biosynthesis and Metabolism	-0.113702	0.441605	0.526685
Acinetobacter	Metabolic Diseases	-0.410197	0.00378386	0.015868
Acinetobacter	Signal Transduction	0.418263	0.00309281	0.013936
Acinetobacter	Signaling Molecules and Interaction	0.139754	0.343444	0.427743
Barnesiella	Carbohydrate Metabolism	-0.344801	0.0163955	0.047365
Barnesiella	Cell Motility	0.424858	0.00261303	0.013065
Barnesiella	Cellular Processes and Signaling	-0.326174	0.0236665	0.065461
Barnesiella	Energy Metabolism	-0.41244	0.00357928	0.01551
Barnesiella	Environmental Adaptation	0.555645	4.13775e-05	0.000384
Barnesiella	Folding, Sorting and Degradation	-0.139241	0.345235	0.427743
Barnesiella	Glycan Biosynthesis and Metabolism	-0.242682	0.0965174	0.176722
Barnesiella	Metabolic Diseases	-0.175307	0.233339	0.330476
Barnesiella	Signal Transduction	0.163549	0.266683	0.361338
Barnesiella	Signaling Molecules and Interaction	-0.388264	0.00639215	0.022459
Clostridium XlVb	Carbohydrate Metabolism	-0.280511	0.0534607	0.121928
Clostridium XlVb	Cell Motility	0.315304	0.0290414	0.075508
Clostridium XlVb	Cellular Processes and Signaling	-0.151763	0.303148	0.394092
Clostridium XlVb	Energy Metabolism	-0.276006	0.057579	0.129056
Clostridium XlVb	Environmental Adaptation	0.40622	0.00417202	0.016435
Clostridium XlVb	Folding, Sorting and Degradation	-0.162564	0.269614	0.361338
Clostridium XlVb	Glycan Biosynthesis and Metabolism	-0.13917	0.345484	0.427743
Clostridium XlVb	Metabolic Diseases	0.00141124	0.992405	0.992405
Clostridium XlVb	Signal Transduction	0.174505	0.235516	0.330476
Clostridium XlVb	Signaling Molecules and Interaction	-0.154802	0.293451	0.38534
Clostridium sensu stricto	Carbohydrate Metabolism	-0.418059	0.0031088	0.013936
Clostridium sensu stricto	Cell Motility	0.478364	0.000583889	0.003995
Clostridium sensu stricto	Cellular Processes and Signaling	-0.304078	0.0356218	0.087374
Clostridium sensu stricto	Energy Metabolism	-0.0720398	0.626554	0.708278
Clostridium sensu stricto	Environmental Adaptation	0.262353	0.0716362	0.149476
Clostridium sensu stricto	Folding, Sorting and Degradation	-0.0135278	0.927288	0.949193
Clostridium sensu stricto	Glycan Biosynthesis and Metabolism	-0.261321	0.0728007	0.149476
Clostridium sensu stricto	Metabolic Diseases	-0.36096	0.0117191	0.03543
Clostridium sensu stricto	Signal Transduction	0.363839	0.0110191	0.03543
Clostridium sensu stricto	Signaling Molecules and Interaction	-0.1845	0.209344	0.309259
Coprobacter	Carbohydrate Metabolism	-0.143147	0.331736	0.422801
Coprobacter	Cell Motility	0.26063	0.0735879	0.149476
Coprobacter	Cellular Processes and Signaling	-0.181405	0.217221	0.317289
Coprobacter	Energy Metabolism	-0.250428	0.0860232	0.164456
Coprobacter	Environmental Adaptation	0.282788	0.0514719	0.119488
Coprobacter	Folding, Sorting and Degradation	-0.0457498	0.757496	0.807168
Coprobacter	Glycan Biosynthesis and Metabolism	-0.0486191	0.742792	0.798041
Coprobacter	Metabolic Diseases	-0.0964412	0.514353	0.607872
Coprobacter	Signal Transduction	0.191448	0.192397	0.290832
Coprobacter	Signaling Molecules and Interaction	-0.120512	0.414557	0.499004
Coprococcus	Carbohydrate Metabolism	-0.570174	2.3312e-05	0.000233
Coprococcus	Cell Motility	0.638855	1.02714e-06	1.9e-05
Coprococcus	Cellular Processes and Signaling	-0.440088	0.00174763	0.009541
Coprococcus	Energy Metabolism	-0.575686	1.86177e-05	0.000202
Coprococcus	Environmental Adaptation	0.714371	1.18535e-08	1e-06
Coprococcus	Folding, Sorting and Degradation	-0.338334	0.0186682	0.052758
Coprococcus	Glycan Biosynthesis and Metabolism	-0.467207	0.0008144	0.005294
Coprococcus	Metabolic Diseases	-0.272629	0.06083	0.134032
Coprococcus	Signal Transduction	0.252676	0.0831522	0.16134
Coprococcus	Signaling Molecules and Interaction	-0.624082	2.14221e-06	3.5e-05
Gemmiger	Carbohydrate Metabolism	-0.446772	0.00145617	0.009014
Gemmiger	Cell Motility	0.480178	0.000552546	0.003991
Gemmiger	Cellular Processes and Signaling	-0.309334	0.0324022	0.082549
Gemmiger	Energy Metabolism	-0.651907	5.19002e-07	1.3e-05
Gemmiger	Environmental Adaptation	0.682105	9.36793e-08	4e-06
Gemmiger	Folding, Sorting and Degradation	-0.248938	0.0879696	0.16574
Gemmiger	Glycan Biosynthesis and Metabolism	-0.232678	0.111503	0.195883
Gemmiger	Metabolic Diseases	-0.0628844	0.671119	0.745688
Gemmiger	Signal Transduction	0.205854	0.160412	0.254312
Gemmiger	Signaling Molecules and Interaction	-0.51021	0.000211709	0.001835
Holdemania	Carbohydrate Metabolism	0.0594078	0.688351	0.758353
Holdemania	Cell Motility	0.185718	0.206301	0.308267
Holdemania	Cellular Processes and Signaling	0.0830396	0.574715	0.655377
Holdemania	Energy Metabolism	0.0352289	0.812104	0.851399
Holdemania	Environmental Adaptation	0.174175	0.236418	0.330476
Holdemania	Folding, Sorting and Degradation	-0.0147152	0.920926	0.949193
Holdemania	Glycan Biosynthesis and Metabolism	0.15585	0.290158	0.384903
Holdemania	Metabolic Diseases	0.0672303	0.649813	0.728239
Holdemania	Signal Transduction	0.229754	0.116202	0.198766
Holdemania	Signaling Molecules and Interaction	0.195127	0.183829	0.28115
Oscillibacter	Carbohydrate Metabolism	-0.406546	0.00413897	0.016435
Oscillibacter	Cell Motility	0.587348	1.14132e-05	0.000135
Oscillibacter	Cellular Processes and Signaling	-0.287676	0.0474039	0.112046
Oscillibacter	Energy Metabolism	-0.361766	0.0115192	0.03543
Oscillibacter	Environmental Adaptation	0.709529	1.64529e-08	1e-06
Oscillibacter	Folding, Sorting and Degradation	-0.293158	0.0431566	0.103896
Oscillibacter	Glycan Biosynthesis and Metabolism	-0.252829	0.0829586	0.16134
Oscillibacter	Metabolic Diseases	-0.00553641	0.970209	0.97773
Oscillibacter	Signal Transduction	0.235949	0.10642	0.189514
Oscillibacter	Signaling Molecules and Interaction	-0.394605	0.00551258	0.020475
Pseudomonas	Carbohydrate Metabolism	-0.170434	0.246793	0.341309
Pseudomonas	Cell Motility	0.258747	0.0757694	0.151539
Pseudomonas	Cellular Processes and Signaling	-0.223658	0.126479	0.208131
Pseudomonas	Energy Metabolism	0.221004	0.131162	0.211355
Pseudomonas	Environmental Adaptation	-0.0544033	0.71343	0.778819
Pseudomonas	Folding, Sorting and Degradation	-0.0906721	0.539942	0.621172
Pseudomonas	Glycan Biosynthesis and Metabolism	-0.122371	0.407342	0.494901
Pseudomonas	Metabolic Diseases	-0.220709	0.13169	0.211355
Pseudomonas	Signal Transduction	0.439797	0.00176142	0.009541
Pseudomonas	Signaling Molecules and Interaction	0.227344	0.120186	0.202912
Psychrobacter	Carbohydrate Metabolism	0.0175348	0.905837	0.94207
Psychrobacter	Cell Motility	0.200693	0.171389	0.26844
Psychrobacter	Cellular Processes and Signaling	-0.175348	0.233228	0.330476
Psychrobacter	Energy Metabolism	-0.308293	0.0330196	0.082549
Psychrobacter	Environmental Adaptation	0.266529	0.0670753	0.142947
Psychrobacter	Folding, Sorting and Degradation	-0.150002	0.308858	0.397539
Psychrobacter	Glycan Biosynthesis and Metabolism	0.00940501	0.949413	0.964248
Psychrobacter	Metabolic Diseases	-0.131033	0.374688	0.459523
Psychrobacter	Signal Transduction	0.226039	0.122386	0.203977
Psychrobacter	Signaling Molecules and Interaction	-0.036823	0.803766	0.849508
Roseburia	Carbohydrate Metabolism	-0.391139	0.00597931	0.021592
Roseburia	Cell Motility	0.594178	8.49319e-06	0.000123
Roseburia	Cellular Processes and Signaling	-0.267047	0.0665251	0.142947
Roseburia	Energy Metabolism	-0.425106	0.00259637	0.013065
Roseburia	Environmental Adaptation	0.641284	9.06765e-07	1.9e-05
Roseburia	Folding, Sorting and Degradation	-0.32375	0.0247864	0.06713
Roseburia	Glycan Biosynthesis and Metabolism	-0.318952	0.0271343	0.071989
Roseburia	Metabolic Diseases	-0.347467	0.0155294	0.045882
Roseburia	Signal Transduction	0.443534	0.00159145	0.009404
Roseburia	Signaling Molecules and Interaction	-0.491077	0.000394069	0.003013
Ruminococcus	Carbohydrate Metabolism	-0.384756	0.00692949	0.023706
Ruminococcus	Cell Motility	0.590607	9.92045e-06	0.000129
Ruminococcus	Cellular Processes and Signaling	-0.363187	0.0111744	0.03543
Ruminococcus	Energy Metabolism	-0.418874	0.00304531	0.013936
Ruminococcus	Environmental Adaptation	0.661017	3.16008e-07	1e-05
Ruminococcus	Folding, Sorting and Degradation	-0.397686	0.00512469	0.019594
Ruminococcus	Glycan Biosynthesis and Metabolism	-0.361394	0.011611	0.03543
Ruminococcus	Metabolic Diseases	-0.163203	0.26771	0.361338
Ruminococcus	Signal Transduction	0.242686	0.0965112	0.176722
Ruminococcus	Signaling Molecules and Interaction	-0.49287	0.000372357	0.003013

## Sheet: Species
species	kegg	cor	pvalue	FDR
Bacteroides coprocola	Carbohydrate Metabolism	-0.322931	0.0251745	0.048529
Bacteroides coprocola	Cell Motility	0.280264	0.0536801	0.085038
Bacteroides coprocola	Cellular Processes and Signaling	-0.396134	0.00531699	0.018145
Bacteroides coprocola	Energy Metabolism	-0.150015	0.308816	0.355519
Bacteroides coprocola	Environmental Adaptation	0.192918	0.188938	0.239921
Bacteroides coprocola	Folding, Sorting and Degradation	-0.113029	0.44433	0.477133
Bacteroides coprocola	Glycan Biosynthesis and Metabolism	-0.193392	0.187834	0.239921
Bacteroides coprocola	Metabolic Diseases	-0.232686	0.11149	0.152482
Bacteroides coprocola	Signal Transduction	0.216294	0.139792	0.186389
Bacteroides coprocola	Signaling Molecules and Interaction	-0.121787	0.409598	0.445821
Bacteroides plebeius	Carbohydrate Metabolism	-0.407765	0.00401731	0.01449
Bacteroides plebeius	Cell Motility	0.430316	0.00226701	0.010254
Bacteroides plebeius	Cellular Processes and Signaling	-0.450106	0.00132767	0.006853
Bacteroides plebeius	Energy Metabolism	-0.359441	0.0121034	0.031306
Bacteroides plebeius	Environmental Adaptation	0.330676	0.0216988	0.045088
Bacteroides plebeius	Folding, Sorting and Degradation	-0.227009	0.120748	0.163726
Bacteroides plebeius	Glycan Biosynthesis and Metabolism	-0.359671	0.0120445	0.031306
Bacteroides plebeius	Metabolic Diseases	-0.392232	0.0058285	0.019428
Bacteroides plebeius	Signal Transduction	0.396029	0.0053302	0.018145
Bacteroides plebeius	Signaling Molecules and Interaction	-0.261641	0.0724374	0.107315
Barnesiella intestinihominis	Carbohydrate Metabolism	-0.344801	0.0163955	0.0396
Barnesiella intestinihominis	Cell Motility	0.424858	0.00261303	0.010452
Barnesiella intestinihominis	Cellular Processes and Signaling	-0.326174	0.0236665	0.047932
Barnesiella intestinihominis	Energy Metabolism	-0.41244	0.00357928	0.013968
Barnesiella intestinihominis	Environmental Adaptation	0.555645	4.13775e-05	0.000541
Barnesiella intestinihominis	Folding, Sorting and Degradation	-0.139241	0.345235	0.383594
Barnesiella intestinihominis	Glycan Biosynthesis and Metabolism	-0.242682	0.0965174	0.134285
Barnesiella intestinihominis	Metabolic Diseases	-0.175307	0.233339	0.278614
Barnesiella intestinihominis	Signal Transduction	0.163549	0.266683	0.311455
Barnesiella intestinihominis	Signaling Molecules and Interaction	-0.388264	0.00639215	0.020455
Clostridium disporicum	Carbohydrate Metabolism	-0.493473	0.000365293	0.002783
Clostridium disporicum	Cell Motility	0.56784	2.56098e-05	0.00041
Clostridium disporicum	Cellular Processes and Signaling	-0.384943	0.00689986	0.02123
Clostridium disporicum	Energy Metabolism	-0.146394	0.320773	0.366597
Clostridium disporicum	Environmental Adaptation	0.362475	0.011346	0.030769
Clostridium disporicum	Folding, Sorting and Degradation	-0.0905236	0.540609	0.569062
Clostridium disporicum	Glycan Biosynthesis and Metabolism	-0.308128	0.0331183	0.05823
Clostridium disporicum	Metabolic Diseases	-0.342673	0.0171158	0.0396
Clostridium disporicum	Signal Transduction	0.425961	0.00253955	0.010452
Clostridium disporicum	Signaling Molecules and Interaction	-0.189262	0.197621	0.245111
Clostridium lactatifermentans	Carbohydrate Metabolism	-0.477676	0.000596181	0.003669
Clostridium lactatifermentans	Cell Motility	0.429647	0.00230711	0.010254
Clostridium lactatifermentans	Cellular Processes and Signaling	-0.332718	0.0208529	0.044022
Clostridium lactatifermentans	Energy Metabolism	-0.466785	0.000824533	0.004712
Clostridium lactatifermentans	Environmental Adaptation	0.519171	0.000156235	0.001499
Clostridium lactatifermentans	Folding, Sorting and Degradation	-0.24962	0.0870746	0.123715
Clostridium lactatifermentans	Glycan Biosynthesis and Metabolism	-0.308431	0.0329372	0.05823
Clostridium lactatifermentans	Metabolic Diseases	-0.176651	0.229718	0.278446
Clostridium lactatifermentans	Signal Transduction	0.262363	0.0716256	0.107104
Clostridium lactatifermentans	Signaling Molecules and Interaction	-0.366589	0.0103845	0.029149
Clostridium leptum	Carbohydrate Metabolism	-0.323879	0.0247258	0.048364
Clostridium leptum	Cell Motility	0.3701	0.00962002	0.027986
Clostridium leptum	Cellular Processes and Signaling	-0.312777	0.0304267	0.055957
Clostridium leptum	Energy Metabolism	-0.467049	0.000818179	0.004712
Clostridium leptum	Environmental Adaptation	0.501399	0.000283117	0.002384
Clostridium leptum	Folding, Sorting and Degradation	-0.343884	0.0167026	0.0396
Clostridium leptum	Glycan Biosynthesis and Metabolism	-0.258367	0.0762166	0.110861
Clostridium leptum	Metabolic Diseases	-0.0806262	0.58592	0.612726
Clostridium leptum	Signal Transduction	0.248804	0.088147	0.123715
Clostridium leptum	Signaling Molecules and Interaction	-0.319757	0.026728	0.050911
Clostridium sporosphaeroides	Carbohydrate Metabolism	-0.314862	0.0292799	0.054474
Clostridium sporosphaeroides	Cell Motility	0.364691	0.0108189	0.029845
Clostridium sporosphaeroides	Cellular Processes and Signaling	-0.165918	0.259724	0.305558
Clostridium sporosphaeroides	Energy Metabolism	-0.294493	0.0421708	0.06956
Clostridium sporosphaeroides	Environmental Adaptation	0.367722	0.0101321	0.028949
Clostridium sporosphaeroides	Folding, Sorting and Degradation	-0.183134	0.212797	0.261904
Clostridium sporosphaeroides	Glycan Biosynthesis and Metabolism	-0.210959	0.150068	0.198437
Clostridium sporosphaeroides	Metabolic Diseases	-0.0446165	0.763327	0.777913
Clostridium sporosphaeroides	Signal Transduction	0.139972	0.342684	0.383423
Clostridium sporosphaeroides	Signaling Molecules and Interaction	-0.282733	0.0515193	0.082431
Coprobacter fastidiosus	Carbohydrate Metabolism	-0.143147	0.331736	0.373787
Coprobacter fastidiosus	Cell Motility	0.26063	0.0735879	0.108019
Coprobacter fastidiosus	Cellular Processes and Signaling	-0.181405	0.217221	0.265308
Coprobacter fastidiosus	Energy Metabolism	-0.250428	0.0860232	0.123715
Coprobacter fastidiosus	Environmental Adaptation	0.282788	0.0514719	0.082431
Coprobacter fastidiosus	Folding, Sorting and Degradation	-0.0457498	0.757496	0.776919
Coprobacter fastidiosus	Glycan Biosynthesis and Metabolism	-0.0486191	0.742792	0.766753
Coprobacter fastidiosus	Metabolic Diseases	-0.0964412	0.514353	0.548643
Coprobacter fastidiosus	Signal Transduction	0.191448	0.192397	0.240496
Coprobacter fastidiosus	Signaling Molecules and Interaction	-0.120512	0.414557	0.44817
Coprococcus eutactus	Carbohydrate Metabolism	-0.40993	0.00380893	0.01449
Coprococcus eutactus	Cell Motility	0.547322	5.68005e-05	0.000649
Coprococcus eutactus	Cellular Processes and Signaling	-0.359333	0.0121312	0.031306
Coprococcus eutactus	Energy Metabolism	-0.554059	4.39799e-05	0.000541
Coprococcus eutactus	Environmental Adaptation	0.615489	3.22911e-06	9.7e-05
Coprococcus eutactus	Folding, Sorting and Degradation	-0.386811	0.00661013	0.020738
Coprococcus eutactus	Glycan Biosynthesis and Metabolism	-0.339913	0.0180901	0.04071
Coprococcus eutactus	Metabolic Diseases	-0.136599	0.354555	0.391233
Coprococcus eutactus	Signal Transduction	0.301073	0.0375776	0.06437
Coprococcus eutactus	Signaling Molecules and Interaction	-0.407288	0.00406455	0.01449
Eubacterium coprostanoligenes	Carbohydrate Metabolism	-0.332577	0.0209102	0.044022
Eubacterium coprostanoligenes	Cell Motility	0.555493	4.16206e-05	0.000541
Eubacterium coprostanoligenes	Cellular Processes and Signaling	-0.327908	0.0228914	0.046957
Eubacterium coprostanoligenes	Energy Metabolism	-0.481866	0.000524746	0.003498
Eubacterium coprostanoligenes	Environmental Adaptation	0.674732	1.44915e-07	1.2e-05
Eubacterium coprostanoligenes	Folding, Sorting and Degradation	-0.339282	0.0183194	0.04071
Eubacterium coprostanoligenes	Glycan Biosynthesis and Metabolism	-0.325275	0.0240769	0.048154
Eubacterium coprostanoligenes	Metabolic Diseases	-0.14462	0.326735	0.370763
Eubacterium coprostanoligenes	Signal Transduction	0.202922	0.166582	0.216692
Eubacterium coprostanoligenes	Signaling Molecules and Interaction	-0.499584	0.000300295	0.002402
Gemmiger formicilis	Carbohydrate Metabolism	-0.446772	0.00145617	0.00706
Gemmiger formicilis	Cell Motility	0.480178	0.000552546	0.003536
Gemmiger formicilis	Cellular Processes and Signaling	-0.309334	0.0324022	0.05823
Gemmiger formicilis	Energy Metabolism	-0.651907	5.19002e-07	2.8e-05
Gemmiger formicilis	Environmental Adaptation	0.682105	9.36793e-08	1.2e-05
Gemmiger formicilis	Folding, Sorting and Degradation	-0.248938	0.0879696	0.123715
Gemmiger formicilis	Glycan Biosynthesis and Metabolism	-0.232678	0.111503	0.152482
Gemmiger formicilis	Metabolic Diseases	-0.0628844	0.671119	0.697267
Gemmiger formicilis	Signal Transduction	0.205854	0.160412	0.210376
Gemmiger formicilis	Signaling Molecules and Interaction	-0.51021	0.000211709	0.001882
Psychrobacter fulvigenes	Carbohydrate Metabolism	0.0175348	0.905837	0.911534
Psychrobacter fulvigenes	Cell Motility	0.200693	0.171389	0.221147
Psychrobacter fulvigenes	Cellular Processes and Signaling	-0.175348	0.233228	0.278614
Psychrobacter fulvigenes	Energy Metabolism	-0.308293	0.0330196	0.05823
Psychrobacter fulvigenes	Environmental Adaptation	0.266529	0.0670753	0.101246
Psychrobacter fulvigenes	Folding, Sorting and Degradation	-0.150002	0.308858	0.355519
Psychrobacter fulvigenes	Glycan Biosynthesis and Metabolism	0.00940501	0.949413	0.949413
Psychrobacter fulvigenes	Metabolic Diseases	-0.131033	0.374688	0.410617
Psychrobacter fulvigenes	Signal Transduction	0.226039	0.122386	0.164553
Psychrobacter fulvigenes	Signaling Molecules and Interaction	-0.036823	0.803766	0.81394
Roseburia inulinivorans	Carbohydrate Metabolism	-0.391139	0.00597931	0.019524
Roseburia inulinivorans	Cell Motility	0.594178	8.49319e-06	0.00017
Roseburia inulinivorans	Cellular Processes and Signaling	-0.267047	0.0665251	0.101246
Roseburia inulinivorans	Energy Metabolism	-0.425106	0.00259637	0.010452
Roseburia inulinivorans	Environmental Adaptation	0.641284	9.06765e-07	3.6e-05
Roseburia inulinivorans	Folding, Sorting and Degradation	-0.32375	0.0247864	0.048364
Roseburia inulinivorans	Glycan Biosynthesis and Metabolism	-0.318952	0.0271343	0.051076
Roseburia inulinivorans	Metabolic Diseases	-0.347467	0.0155294	0.038226
Roseburia inulinivorans	Signal Transduction	0.443534	0.00159145	0.007489
Roseburia inulinivorans	Signaling Molecules and Interaction	-0.491077	0.000394069	0.002866
Ruminococcus bromii	Carbohydrate Metabolism	-0.342069	0.0173251	0.0396
Ruminococcus bromii	Cell Motility	0.482408	0.000516089	0.003498
Ruminococcus bromii	Cellular Processes and Signaling	-0.267375	0.06618	0.101246
Ruminococcus bromii	Energy Metabolism	-0.37331	0.00896407	0.02656
Ruminococcus bromii	Environmental Adaptation	0.518611	0.00015927	0.001499
Ruminococcus bromii	Folding, Sorting and Degradation	-0.304013	0.0356628	0.062022
Ruminococcus bromii	Glycan Biosynthesis and Metabolism	-0.278988	0.0548261	0.086002
Ruminococcus bromii	Metabolic Diseases	-0.0918691	0.534583	0.566445
Ruminococcus bromii	Signal Transduction	0.268792	0.0647012	0.100507
Ruminococcus bromii	Signaling Molecules and Interaction	-0.373419	0.00894249	0.02656
Ruminococcus callidus	Carbohydrate Metabolism	-0.299611	0.038561	0.064945
Ruminococcus callidus	Cell Motility	0.570039	2.34398e-05	0.00041
Ruminococcus callidus	Cellular Processes and Signaling	-0.333784	0.0204222	0.044022
Ruminococcus callidus	Energy Metabolism	-0.456205	0.00111854	0.005966
Ruminococcus callidus	Environmental Adaptation	0.613031	3.62333e-06	9.7e-05
Ruminococcus callidus	Folding, Sorting and Degradation	-0.349217	0.0149822	0.037455
Ruminococcus callidus	Glycan Biosynthesis and Metabolism	-0.292707	0.0434942	0.071011
Ruminococcus callidus	Metabolic Diseases	-0.300713	0.0378177	0.06437
Ruminococcus callidus	Signal Transduction	0.351654	0.0142478	0.036185
Ruminococcus callidus	Signaling Molecules and Interaction	-0.407179	0.00407543	0.01449
Ruminococcus gnavus	Carbohydrate Metabolism	0.448762	0.00137819	0.006891
Ruminococcus gnavus	Cell Motility	-0.528658	0.000112201	0.001197
Ruminococcus gnavus	Cellular Processes and Signaling	0.427486	0.00244101	0.010452
Ruminococcus gnavus	Energy Metabolism	0.343356	0.0168816	0.0396
Ruminococcus gnavus	Environmental Adaptation	-0.596396	7.70468e-06	0.00017
Ruminococcus gnavus	Folding, Sorting and Degradation	0.169019	0.250798	0.297242
Ruminococcus gnavus	Glycan Biosynthesis and Metabolism	0.334129	0.0202845	0.044022
Ruminococcus gnavus	Metabolic Diseases	0.296895	0.0404435	0.067406
Ruminococcus gnavus	Signal Transduction	-0.192141	0.190762	0.24033
Ruminococcus gnavus	Signaling Molecules and Interaction	0.463851	0.000898168	0.004955
